# Supplementary material for: Trends in the Incidence of New-Onset Anorexia Nervosa and Atypical Anorexia Nervosa Among Youth During the COVID-19 Pandemic in Canada
Source: PubMed Central journal article supplement (PMC8652595; doi:10.1001/jamanetworkopen.2021.37395), 2021-12-07

## Supplementary Online Content

Agostino H, Burstein B, Moubayed D, et al. Trends in the incidence of new-onset anorexia nervosa and atypical anorexia nervosa among youth during the COVID-19 pandemic in Canada. *JAMA Netw Open*. 2021;4(12):e2137395.  
doi:10.1001/jamanetworkopen.2021.37395

**eFigure 1.** Interrupted Time Series of New Anorexia Nervosa/Atypical Anorexia Nervosa Cases per Month (With 95% Confidence Interval) by Study Site, January 2015 to November 2020

**eFigure 2.** Interrupted Time Series of Hospitalizations for New Anorexia Nervosa/Atypical Anorexia Nervosa per Month (With 95% Confidence Interval) by Study Site, January 2015 to November 2020

This supplementary material has been provided by the authors to give readers additional information about their work.

eFigure 1. Interrupted Time Series of New Anorexia Nervosa/Atypical Anorexia Nervosa Cases per Month (With 95% Confidence Interval) by Study Site, January 2015 to November 2020

BC Children’s Hospital

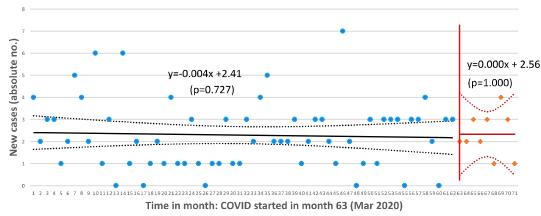

Alberta Children’s Hospital

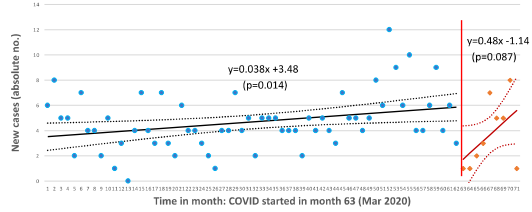

McMaster Children’s Hospital

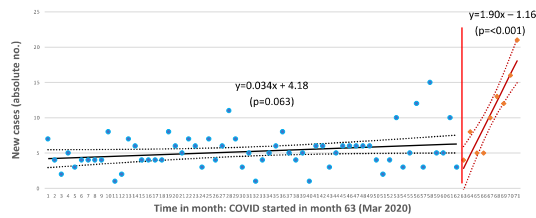

Sainte Justine Hospital

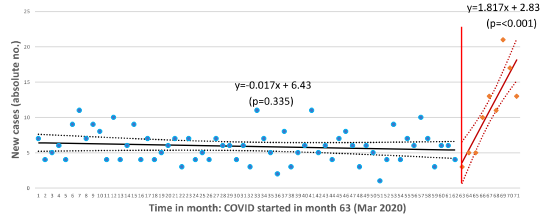

Montreal Children’s Hospital

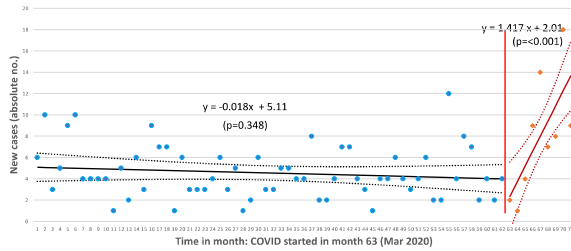

Janeway Children’s Hospital

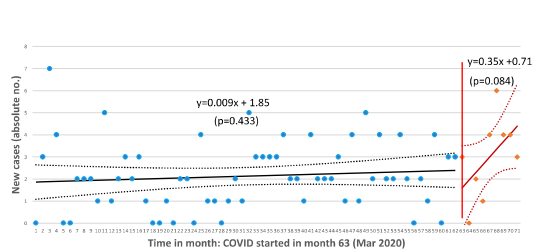

eFigure 2. Interrupted Time Series of Hospitalizations for New Anorexia Nervosa/Atypical Anorexia Nervosa per Month (With 95% Confidence Interval) by Study Site, January 2015 to November 2020

BC Children’s Hospital

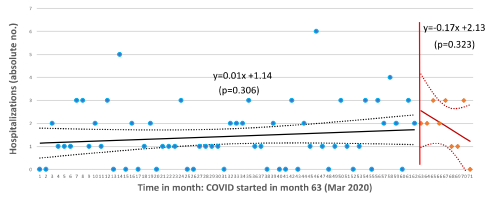

Alberta Children’s Hospital

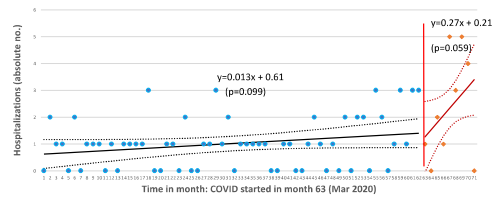

McMaster Children’s Hospital

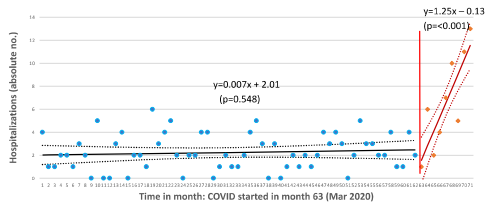

Sainte Justine Hospital

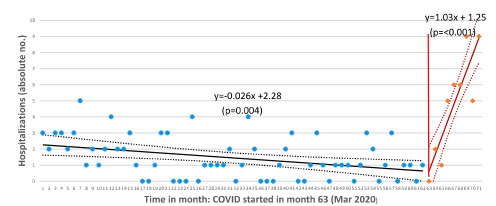

Montreal Children’s Hospital

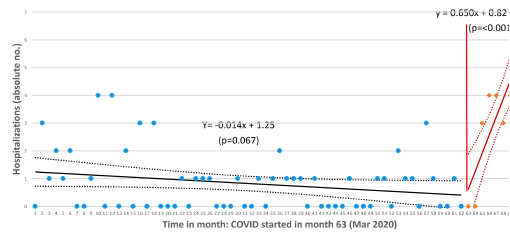

Janeway Children’s Hospital

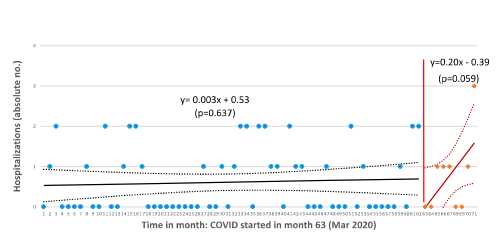

Supplement: jamanetwopen-e2137395-s001.pdf [file jamanetwopen-e2137395-s001.pdf]
